# Supplementary material for: To Explore the Efficacy of Modified Altemeier Procedure in the Treatment of Complete Rectal Prolapse
Source: Preprints.org preprint supplement (doi:10.20944/preprints202304.0576.v1), 2023-04-19
Supplement: Supplementary file 2 [file supplementary]

Archive with 3 entries (3 files):
- chicklist.pdf
- photo introduction.docx
- Table.docx
