# Supplementary material for: To Explore the Efficacy of Modified Altemeier Procedure in the Treatment of Complete Rectal Prolapse
Source: Preprints.org preprint supplement (doi:10.20944/preprints202304.0576.v1), 2023-04-19
Supplement: Supplementary file 2 [file supplementary › photo introduction.docx]

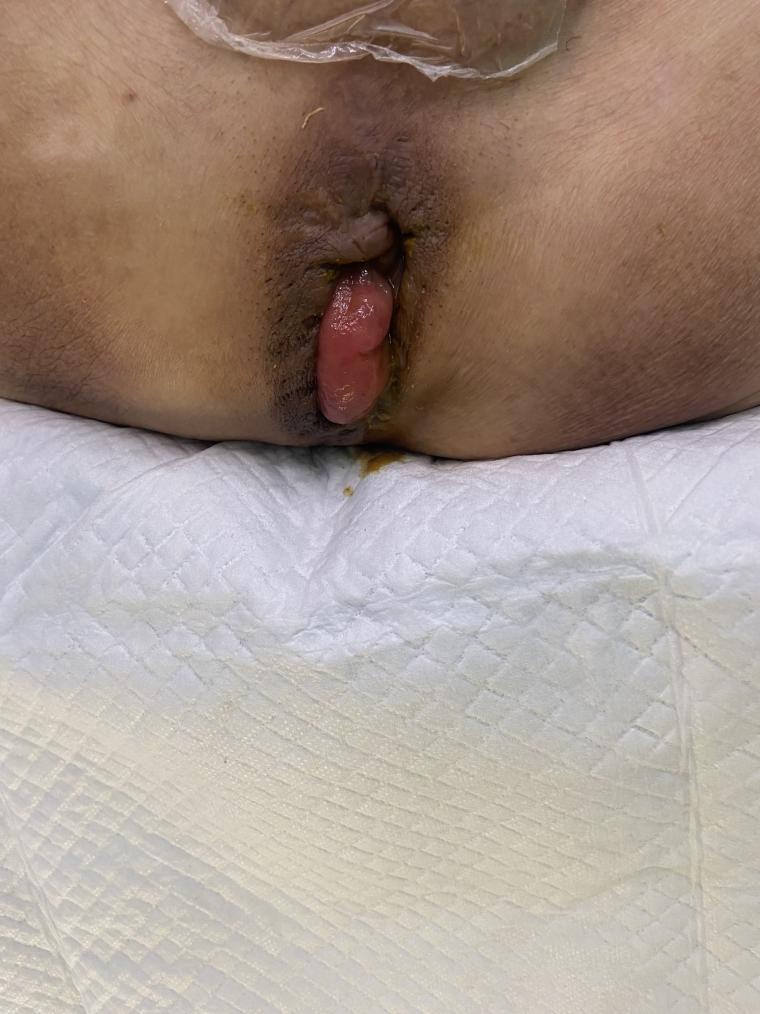


（figue1 Hole-shaped anus before surgery）


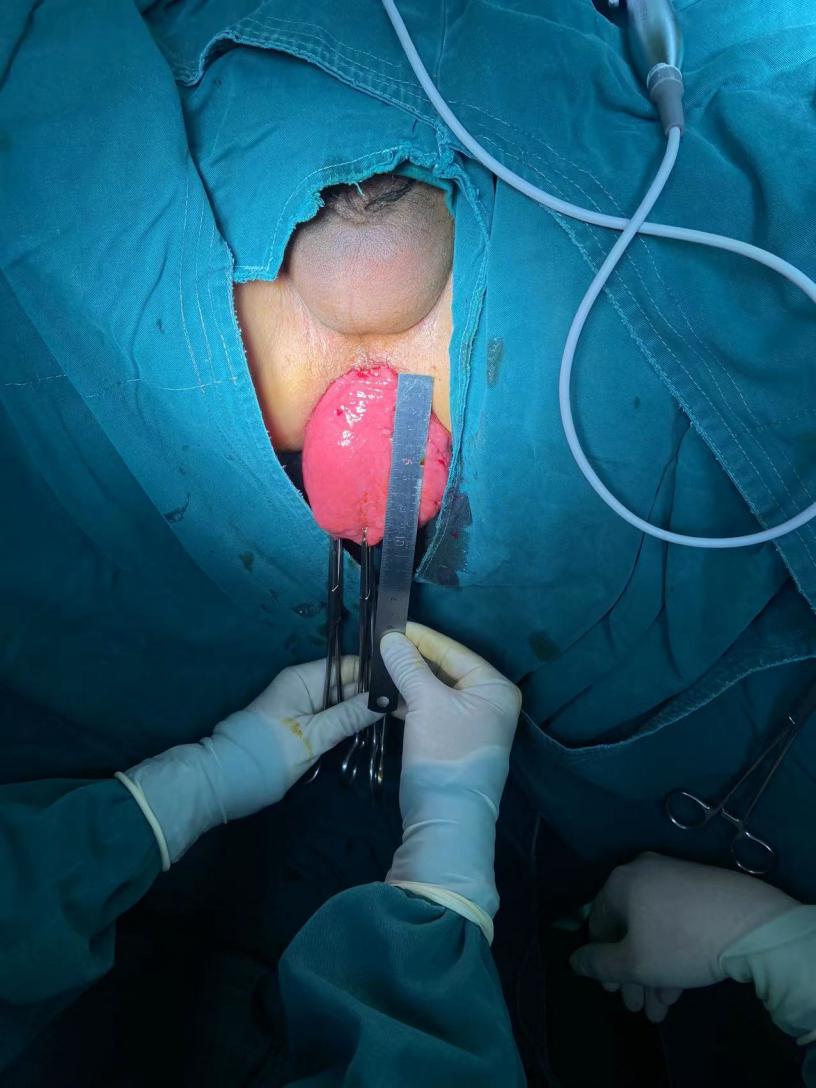


（figure2 Maximum prolapse length before surgery）

The maximum length of rectal prolapse in the enrolled patients exceeded 10 cm


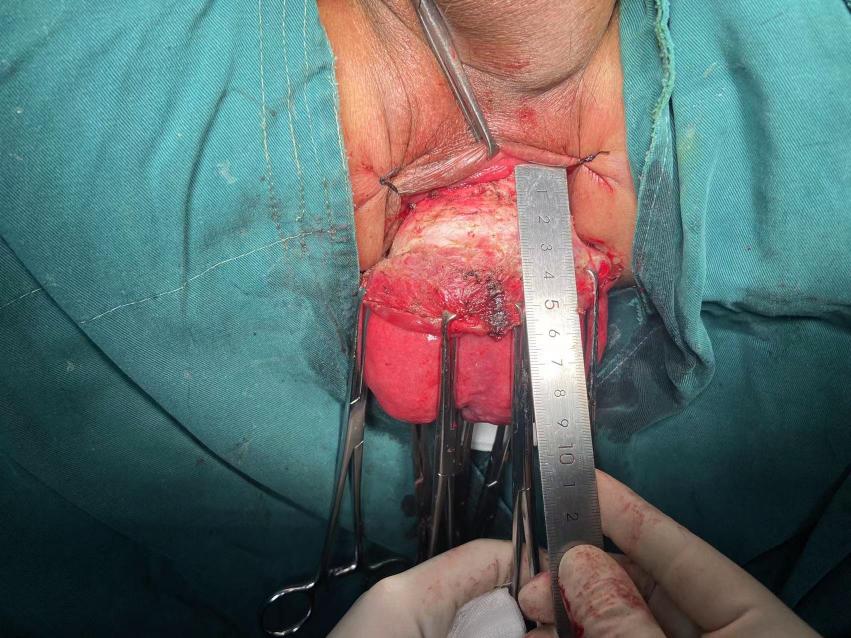


（figue 3 Separate the rectal mucosa layer by layer to the muscle layer）

An ultrasonic knife is used to separate the rectal mucosa to the muscularis layer by

layer along the marked line. Unlike the conventional procedure, the modified

Altemeier procedure pays more attention to the preservation and protection of the

muscular sheath.


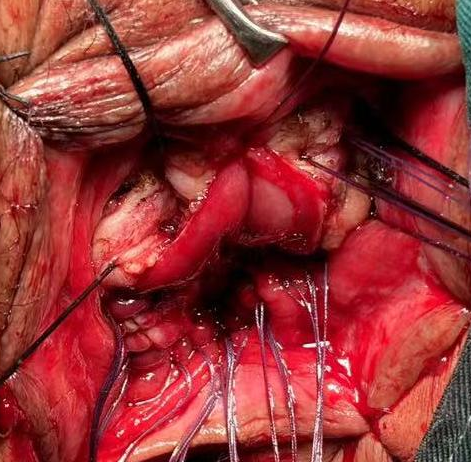


（figue 4 Diagram of the anastomosis before and after the end of surgery）

The modified Altemeier procedure requires interrupted sutures in the proximal

intestinal plasma muscle layer and in the sphincter site within the rectal stump to

allow the anastomosis to lie within the muscle sheath.


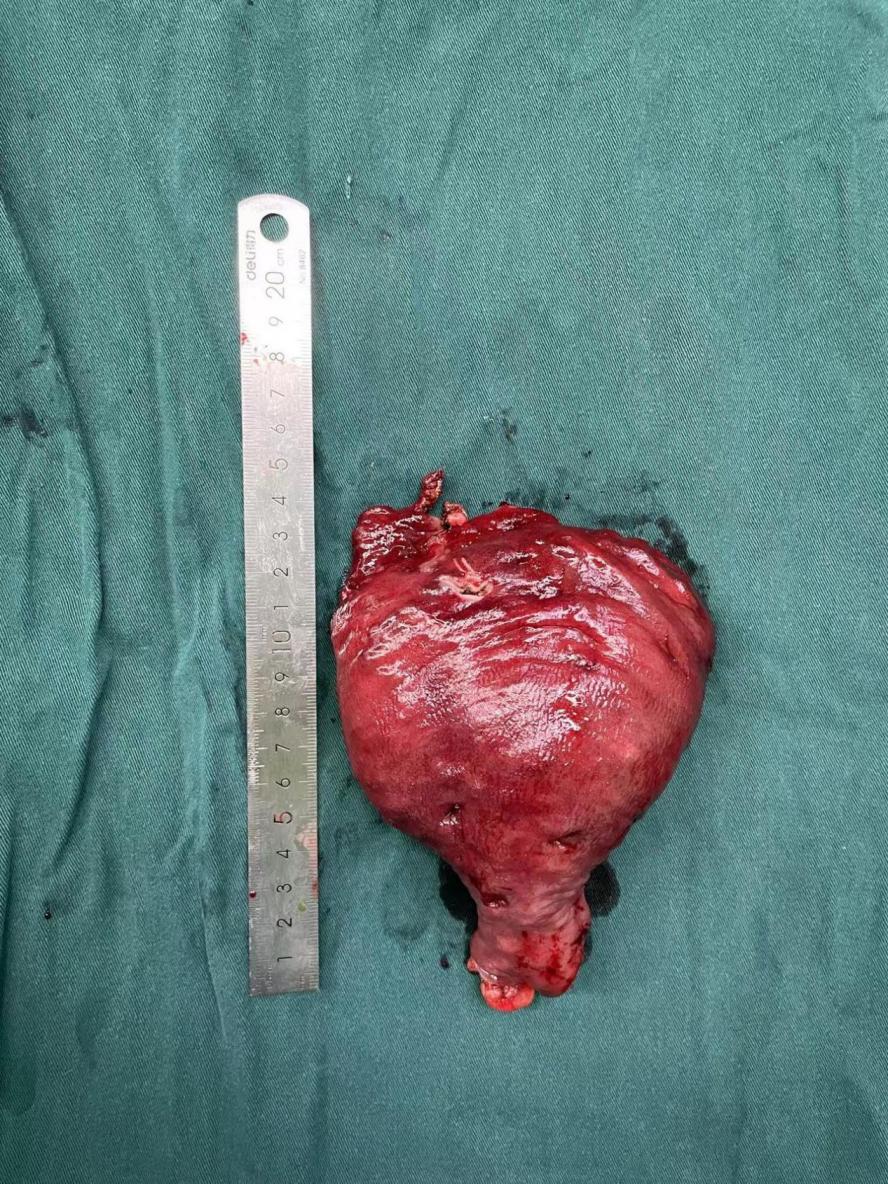


（figure5 Surgically resected rectal prolapse specimen）

The anatomical defect of pathological dilatation of the distal rectum was presented in the surgical specimen


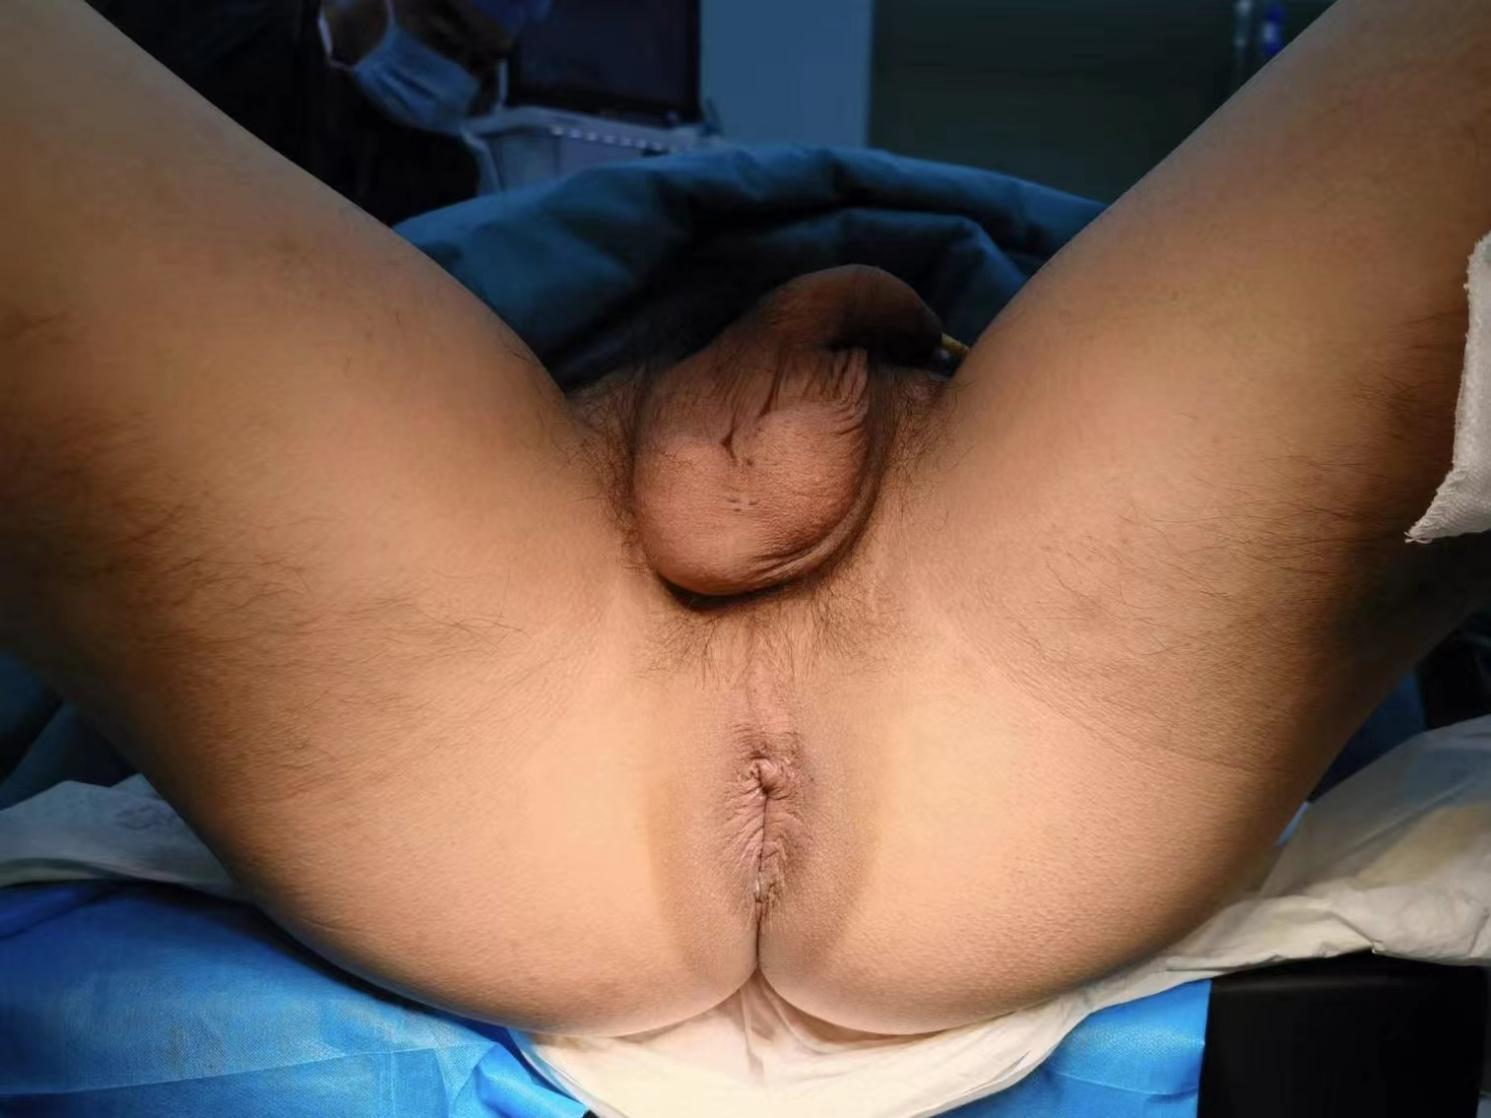


（figure 6Postoperative anal）
