# Supplementary material for: To Explore the Efficacy of Modified Altemeier Procedure in the Treatment of Complete Rectal Prolapse
Source: Preprints.org preprint supplement (doi:10.20944/preprints202304.0576.v1), 2023-04-19
Supplement: Supplementary file 2 [file supplementary › Table.docx]

Table 1 Comparison of baseline data of CRP patients between traditional group and modified group.

| Baseline data | Traditional group | Modified group | *X2/T/Z* | *P* value |
| --- | --- | --- | --- | --- |
| N | 30 | 30 |  |  |
| Gender |  |  |  |  |
| Male (%) | 19（63.3） | 21（70） | 0.30 | 0.58 |
| Female (%) | 11（36.6） | 9（30） |  |  |
| Age (years) | 42.47±20.51 | 44.60±18.20 | 0.450 | 0.65 |
| Duration of disease (years) | 16.8±18.64 | 27.13±18.64 | 284.5 | 0.01 |
| Maximum prolapse length in squat position (cm) | 8.27±4.03 | 10.60±3.61 | 283 | 0.01 |

Table 2 Comparison of perioperative and postoperative complications between the traditional and modified groups.

|  | Traditional group | Modified group | Z | *P* value |
| --- | --- | --- | --- | --- |
| N | 30 | 30 |  |  |
| Time of surgery (min) | 103.17±29.62 | 170.83±54.54 | 118.00 | <0.01 |
| Intraoperative bleeding (ml) | 29.03±8.43 | 21.1±12.61 | 191.00 | <0.01 |
| Number of days in hospital (d) | 15.76±7.88 | 15.37±6.81 | 403.50 | 0.49 |
| Postoperative complications |  |  |  |  |
| Anastomotic bleeding (%) | 3（10.0） | 1（3.3） |  |  |
| Anastomotic leak (%) | 3（10.0） | 0 |  |  |
| Anal stenosis (%) | 2（6.7） | 0 |  |  |
| Blood in the stool (%) | 2（6.7） | 1（3.3） |  |  |

Table 3 Comparison of preoperative and postoperative Wexner anal incontinence scores and autonomous quality of life scores between the conventional and modified groups.

|  | Traditional group | Modified group | Z | *P* value |
| --- | --- | --- | --- | --- |
| N | 30 | 30 |  |  |
| Wexner anal incontinence score |  |  |  |  |
| Pre-operative | 8.57±3.87 | 7.30±4.36 | 387.00 | 0.35 |
| Final postoperative follow-up | 7.47±4.49 | 4.60±3.44 | 286.50 | 0.02 |
| ED⁃5Q⁃5L quality of life autonomy score |  |  |  |  |
| Pre-operative | 8.33±4.21 | 7.533±6.25 | 349.50 | 0.11 |
| Final postoperative follow-up | 6.77±5.59 | 1.27±1.62 | 126.50 | <0.01 |

Table 4 Comparison of recurrence in the traditional and modified groups.

| Follow-up time | Traditional group | Modified group | Chi-value | *P* value |
| --- | --- | --- | --- | --- |
| 2 months after surgery | 2 | 0 |  |  |
| 4 months after surgery | 3 | 0 |  |  |
| 6 months after surgery | 3 | 0 |  |  |
| 8 months after surgery | 0 | 1 | 9.23 | 0.02 |
